# Supplementary material for: Facile synthesis of BiOI/CdWO4 p–n junctions: enhanced photocatalytic activities and photoelectrochemistry
Source: Royal Society of Chemistry journal article supplement (doi:10.1039/c5ra23383f), 2016-01-01
Supplement: c5ra23383f1.pdf [file c5ra23383f1.pdf]

Supporting information for

**Facile synthesis of BiOI/CdWO<sub>4</sub> p-n junction: Enhanced  
Photocatalytic Activities and Photoelectrochemistry**

Yi Feng, Chunbo Liu, Jibin Chen, Huinan Che, Lisong Xiao, Wei Gu, Weidong Shi\*

*School of Chemistry and Chemical Engineering, Jiangsu University, Zhenjiang,  
212013, P. R. China.*

*\*Corresponding author: Tel: +86 511 8879 0187 Fax. : +86 511 8879 1108*

*E-mail address: swd1978@ujs.edu.cn*

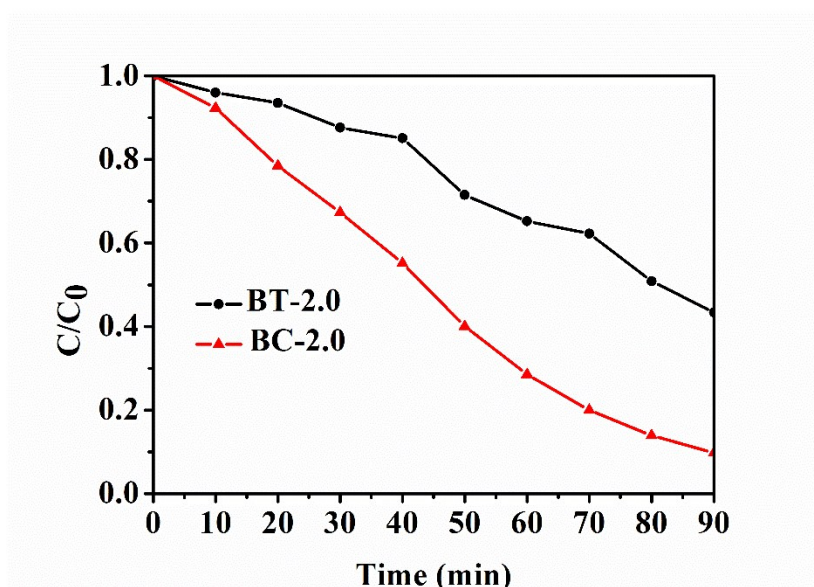

Fig. S1. Photocatalytic activities of BC-2.0 and BT-2.0 photocatalysts for the photodegradation of RhB in aqueous solution under visible light irradiation.

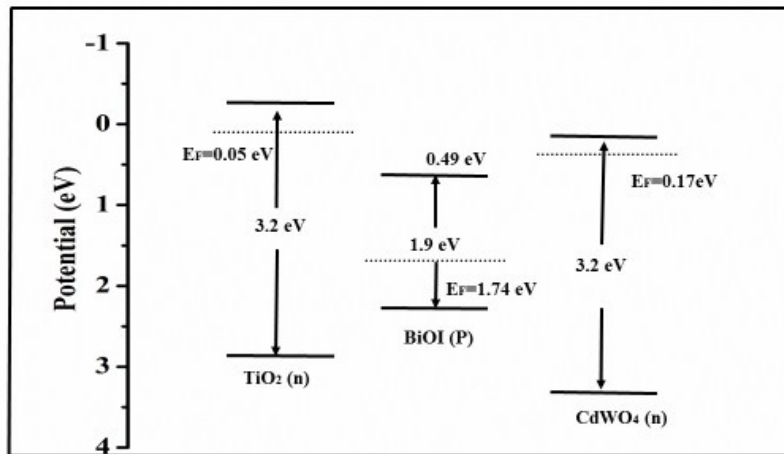

2016/1/22

Fig.S2. (a) the VB, CB and Fermi level of  $\text{CdWO}_4$ ,  $\text{TiO}_2$ , and  $\text{BiOI}$ .
